# Supplementary material for: A powerful method for pleiotropic analysis under composite null hypothesis identifies novel shared loci between Type 2 Diabetes and Prostate Cancer
Source: PubMed Central journal article supplement (PMC7748289; doi:10.1371/journal.pgen.1009218), 2020-12-08
Supplement: pgen.1009218.s003.pdf [file pgen.1009218.s003.pdf]

**Scenario III: 2 correlated quantitative traits from the same study**

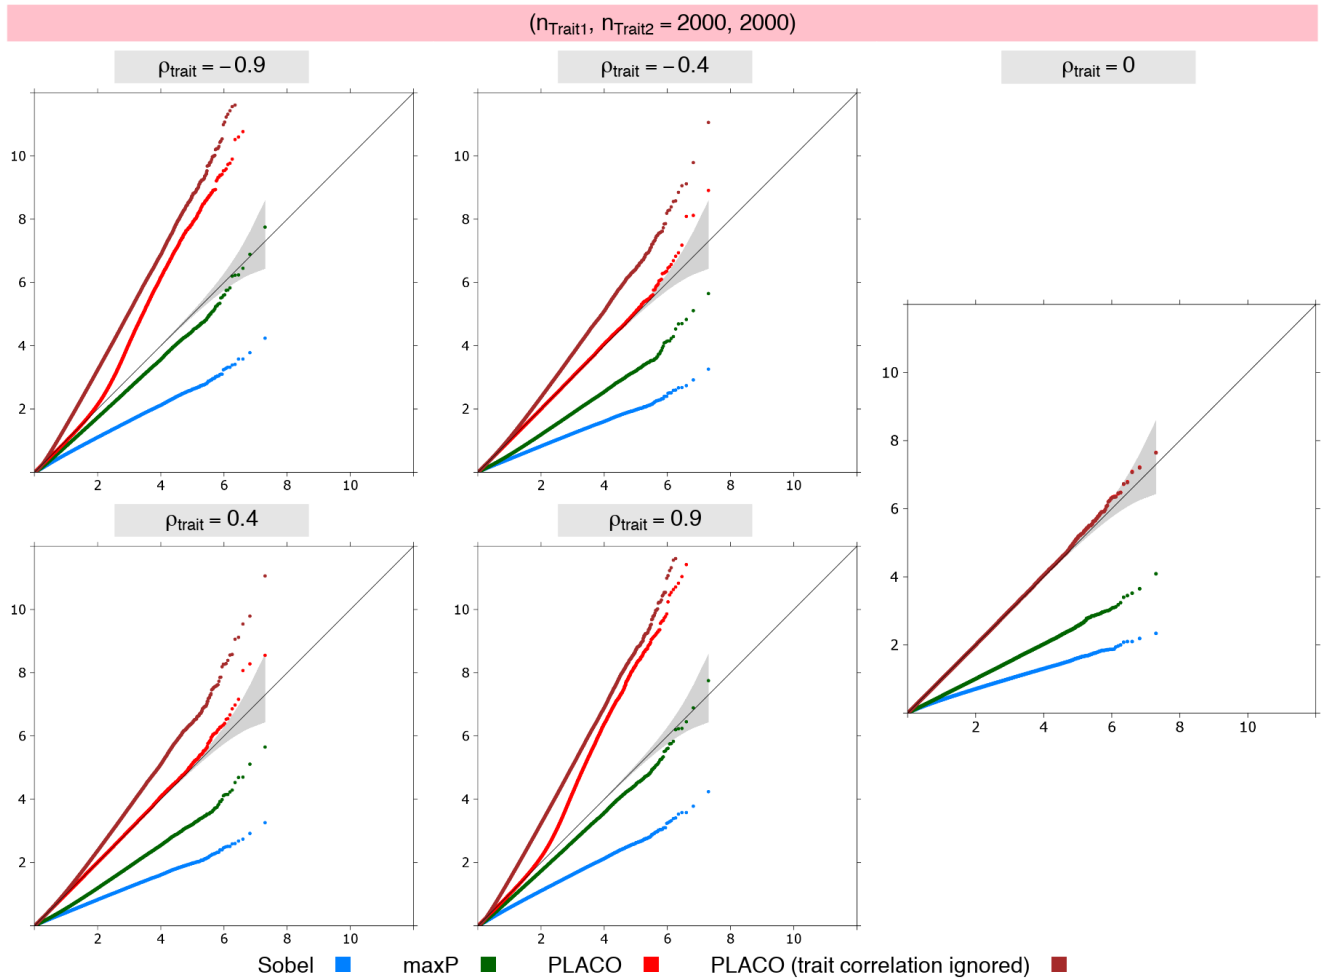

**S2 Fig: Scenario III: QQ plots for the pleiotropic analysis of null data on 2 correlated traits where each trait is measured on the same 2,000 individuals.** Observed ( $-\log_{10}p$ -values) are plotted on the y-axis and Expected ( $-\log_{10}p$ -values) on the x-axis. Type I error performance of tests of pleiotropic effect of a genetic variant on the 2 traits is based on 9.99 million null variants with genetic effects that are either  $\{\beta_1 = 0 = \beta_2\}$  or  $\{\beta_1 = 0, \beta_2 \text{ explains } 0.1\% \text{ of Trait } 2 \text{ variance}\}$  or  $\{\beta_1 \text{ explains } 0.1\% \text{ of Trait } 1 \text{ variance}, \beta_2 = 0\}$ . The gray shaded region represents a conservative 95% confidence interval for the expected distribution of p-values. P-values  $\geq 10^{-12}$  are shown here.
