# Supplementary material for: A powerful method for pleiotropic analysis under composite null hypothesis identifies novel shared loci between Type 2 Diabetes and Prostate Cancer
Source: PubMed Central journal article supplement (PMC7748289; doi:10.1371/journal.pgen.1009218), 2020-12-08
Supplement: pgen.1009218.s004.pdf [file pgen.1009218.s004.pdf]

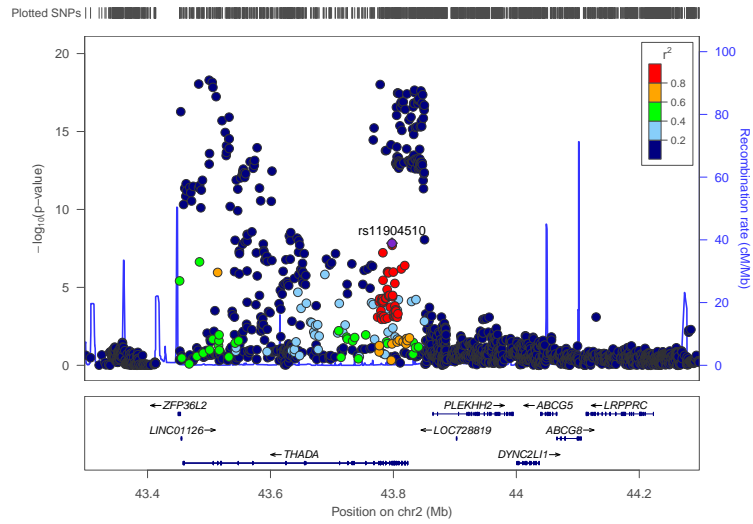

(a) T2D p-values

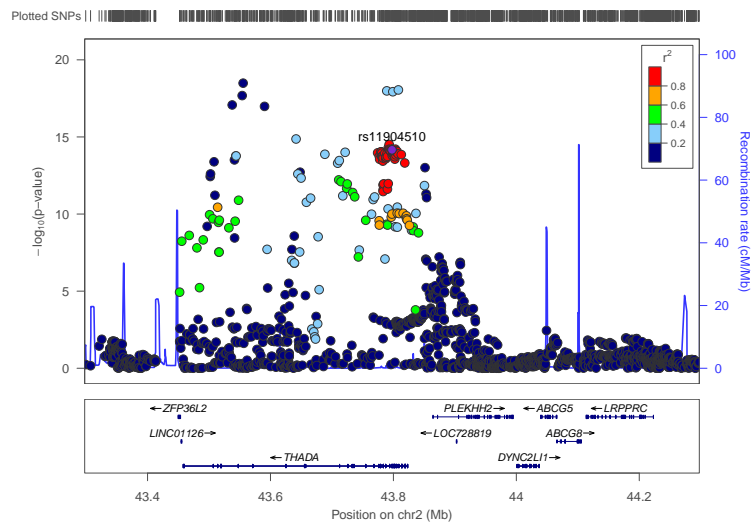

(b) PrCa p-values

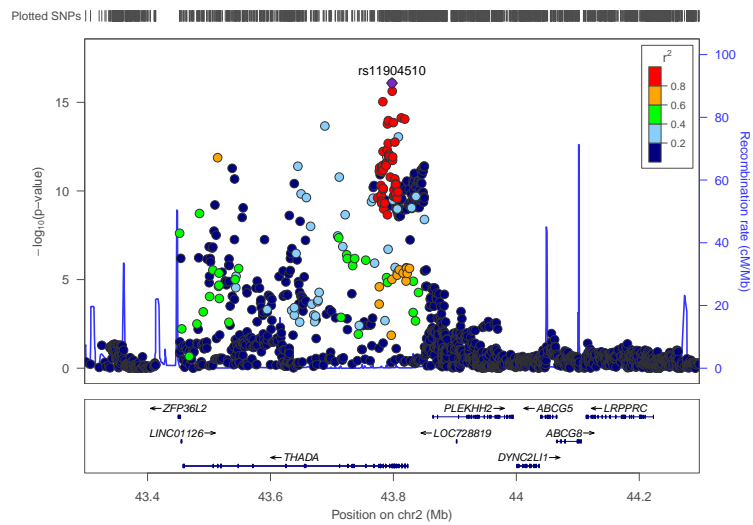

(c) PLACO p-values

S3 Fig: Locuszoom plots of association p-values for variants in and around gene *THADA*.
