# Supplementary material for: A powerful method for pleiotropic analysis under composite null hypothesis identifies novel shared loci between Type 2 Diabetes and Prostate Cancer
Source: PubMed Central journal article supplement (PMC7748289; doi:10.1371/journal.pgen.1009218), 2020-12-08
Supplement: pgen.1009218.s010.pdf [file pgen.1009218.s010.pdf]

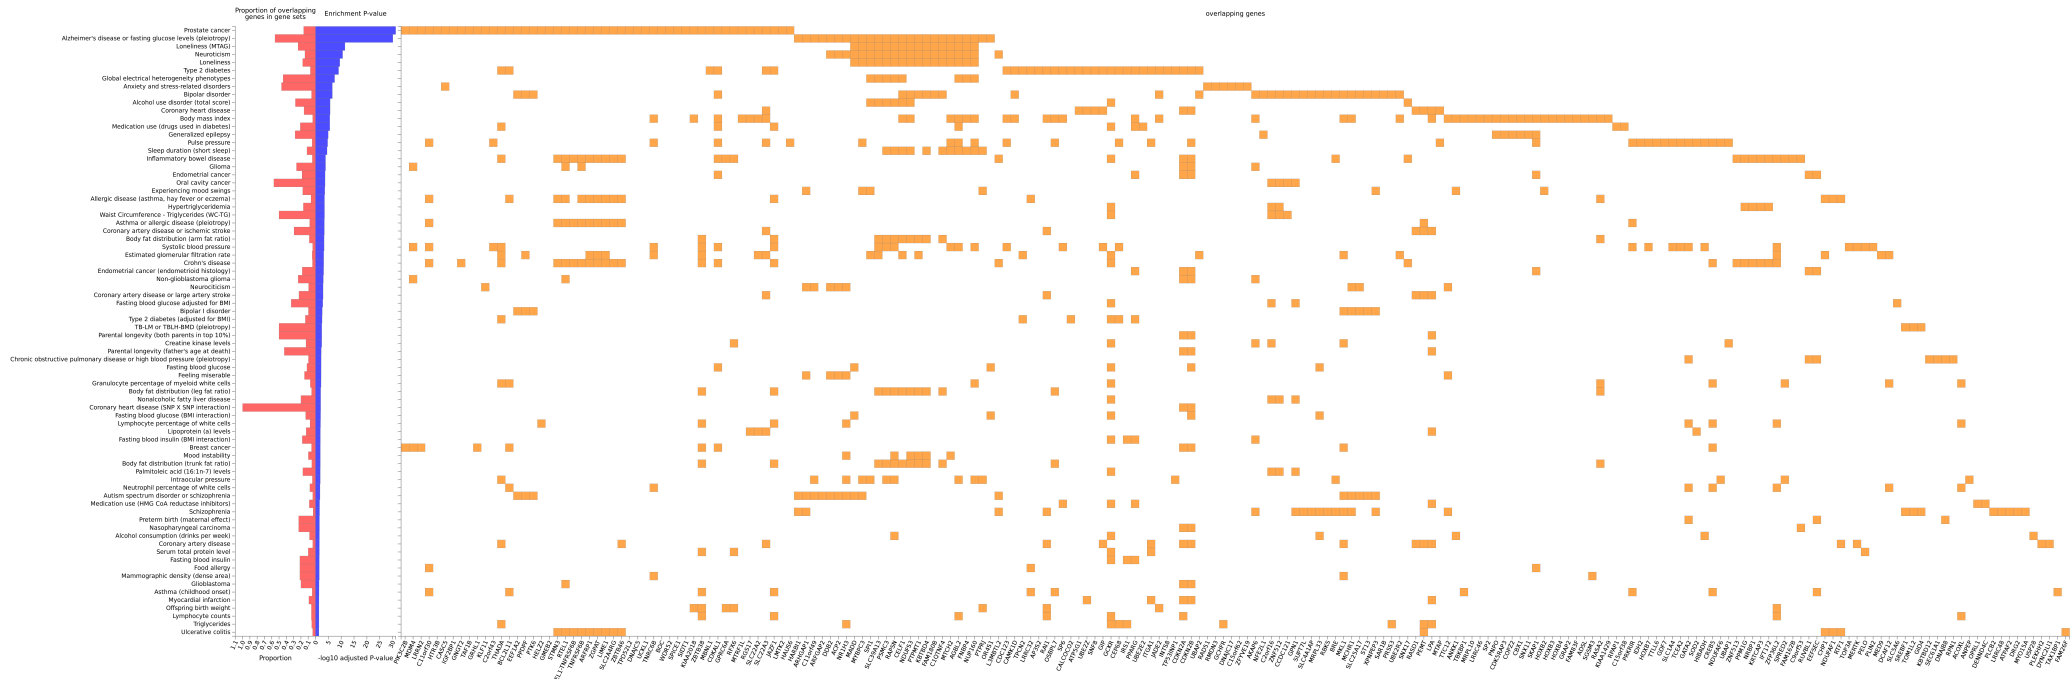

S9 Fig: Mapped genes (as done by FUMA) for the 43 pleiotropic loci detected by PLACO were tested for enrichment in GWAS catalog reported genes across diseases and traits.
