# Supplementary material for: A powerful method for pleiotropic analysis under composite null hypothesis identifies novel shared loci between Type 2 Diabetes and Prostate Cancer
Source: PubMed Central journal article supplement (PMC7748289; doi:10.1371/journal.pgen.1009218), 2020-12-08
Supplement: pgen.1009218.s018.pdf [file pgen.1009218.s018.pdf]

**S1 Table: Scenario I: Comparison of PLACO and GPA in terms of error control and power for 2 independent case-control studies, where each study has 1,000 unrelated cases and 1,000 unrelated controls.** Each study has  $9.9 \times 10^6$  null variants (i.e., variants under  $H_{00}$  or  $H_{01}$  or  $H_{02}$ ) and  $m$  non-null (pleiotropic) variants, where  $m$  takes values 0, 100, 300, 500, 1000, 3000, 5000 or 10000. Five different choices of odds ratios of association of  $m$  non-null variants with Traits 1 and 2 are considered. The total number of true positives (non-null variants) detected (#TP) and the total number of false positives detected (#FP) are reported. PLACO's performance for both genome-wide threshold  $5 \times 10^{-8}$  (or equivalently family-wise error rate (FWER) of 5%) and global false discovery rate (FDR) of 5% are reported, while GPA's performance is based on global FDR of 5%.

| Non-null OR  | Simulation type   |                 | PLACO   |     |        |     | GPA    |     |
|--------------|-------------------|-----------------|---------|-----|--------|-----|--------|-----|
|              | # null SNPs       | # non-null SNPs | FWER 5% |     | FDR 5% |     | FDR 5% |     |
|              |                   |                 | #TP     | #FP | #TP    | #FP | #TP    | #FP |
| (1.5, 1.5)   | $9.9 \times 10^6$ | 0               | 0       | 1   | 0      | 0   | 0      | 0   |
|              | $9.9 \times 10^6$ | 100             | 4       | 1   | 2      | 1   | 0      | 0   |
|              | $9.9 \times 10^6$ | 300             | 20      | 1   | 29     | 2   | 0      | 0   |
|              | $9.9 \times 10^6$ | 500             | 35      | 1   | 66     | 2   | 0      | 0   |
|              | $9.9 \times 10^6$ | 1000            | 67      | 1   | 161    | 4   | 0      | 0   |
|              | $9.9 \times 10^6$ | 3000            | 189     | 1   | 773    | 34  | 664    | 25  |
|              | $9.9 \times 10^6$ | 5000            | 340     | 1   | 1544   | 74  | 1370   | 62  |
|              | $9.9 \times 10^6$ | $10^4$          | 708     | 1   | 3879   | 175 | 3584   | 154 |
| (1.7, 1.7)   | $9.9 \times 10^6$ | 0               | 0       | 1   | 0      | 0   | 0      | 0   |
|              | $9.9 \times 10^6$ | 100             | 44      | 1   | 61     | 2   | 0      | 0   |
|              | $9.9 \times 10^6$ | 300             | 147     | 1   | 209    | 8   | 0      | 0   |
|              | $9.9 \times 10^6$ | 500             | 238     | 1   | 354    | 13  | 0      | 0   |
|              | $9.9 \times 10^6$ | 1000            | 465     | 1   | 770    | 33  | 764    | 41  |
|              | $9.9 \times 10^6$ | 3000            | 1390    | 1   | 2497   | 112 | 2520   | 177 |
|              | $9.9 \times 10^6$ | 5000            | 2318    | 1   | 4329   | 198 | 4393   | 307 |
|              | $9.9 \times 10^6$ | $10^4$          | 4736    | 1   | 8980   | 432 | 9142   | 685 |
| (1.5, 1/1.5) | $9.9 \times 10^6$ | 0               | 0       | 1   | 0      | 0   | 0      | 0   |
|              | $9.9 \times 10^6$ | 100             | 3       | 1   | 3      | 1   | 0      | 0   |
|              | $9.9 \times 10^6$ | 300             | 10      | 1   | 12     | 1   | 0      | 0   |
|              | $9.9 \times 10^6$ | 500             | 19      | 1   | 28     | 2   | 0      | 0   |
|              | $9.9 \times 10^6$ | 1000            | 39      | 1   | 85     | 2   | 0      | 0   |
|              | $9.9 \times 10^6$ | 3000            | 133     | 1   | 478    | 20  | 428    | 12  |
|              | $9.9 \times 10^6$ | 5000            | 236     | 1   | 977    | 41  | 876    | 36  |
|              | $9.9 \times 10^6$ | $10^4$          | 476     | 1   | 2609   | 127 | 2321   | 100 |
| (1.7, 1/1.7) | $9.9 \times 10^6$ | 0               | 0       | 1   | 0      | 0   | 0      | 0   |
|              | $9.9 \times 10^6$ | 100             | 19      | 1   | 21     | 2   | 0      | 0   |
|              | $9.9 \times 10^6$ | 300             | 64      | 1   | 115    | 2   | 0      | 0   |
|              | $9.9 \times 10^6$ | 500             | 122     | 1   | 243    | 9   | 0      | 0   |
|              | $9.9 \times 10^6$ | 1000            | 257     | 1   | 577    | 26  | 552    | 22  |
|              | $9.9 \times 10^6$ | 3000            | 831     | 1   | 2035   | 94  | 2040   | 101 |
|              | $9.9 \times 10^6$ | 5000            | 1380    | 1   | 3576   | 157 | 3608   | 207 |
|              | $9.9 \times 10^6$ | $10^4$          | 2813    | 1   | 7726   | 377 | 7896   | 464 |
| (1.7, 1.2)   | $9.9 \times 10^6$ | 0               | 0       | 1   | 0      | 0   | 0      | 0   |
|              | $9.9 \times 10^6$ | 100             | 0       | 1   | 0      | 0   | 0      | 0   |
|              | $9.9 \times 10^6$ | 300             | 4       | 1   | 0      | 0   | 0      | 0   |
|              | $9.9 \times 10^6$ | 500             | 9       | 1   | 10     | 1   | 0      | 0   |
|              | $9.9 \times 10^6$ | 1000            | 17      | 1   | 23     | 2   | 118    | 3   |
|              | $9.9 \times 10^6$ | 3000            | 40      | 1   | 109    | 2   | 707    | 29  |
|              | $9.9 \times 10^6$ | 5000            | 78      | 1   | 267    | 9   | 1442   | 61  |
|              | $9.9 \times 10^6$ | $10^4$          | 144     | 1   | 844    | 35  | 3607   | 155 |

# denotes total number (e.g. #TP denotes total number of true positives detected).
