# Supplementary material for: A powerful method for pleiotropic analysis under composite null hypothesis identifies novel shared loci between Type 2 Diabetes and Prostate Cancer
Source: PubMed Central journal article supplement (PMC7748289; doi:10.1371/journal.pgen.1009218), 2020-12-08
Supplement: pgen.1009218.s019.pdf [file pgen.1009218.s019.pdf]

**S2 Table: Scenario I: Comparison of PLACO and GPA in terms of error control and power for 2 independent case-control studies, where Study 1 has 4 times sample size as Study 2, and Study 2 has 1,000 unrelated cases and 1,000 unrelated controls.** Each study has  $9.9 \times 10^6$  null variants (i.e., variants under  $H_{00}$  or  $H_{01}$  or  $H_{02}$ ) and  $m$  non-null (pleiotropic) variants, where  $m$  takes values 0, 100, 300, 500, 1000, 3000, 5000 or 10000. Five different choices of odds ratios of association of  $m$  non-null variants with Traits 1 and 2 are considered. The total number of true positives (non-null variants) detected (#TP) and the total number of false positives detected (#FP) are reported. PLACO's performance for both genome-wide threshold  $5 \times 10^{-8}$  (or equivalently family-wise error rate (FWER) of 5%) and global false discovery rate (FDR) of 5% are reported, while GPA's performance is based on global FDR of 5%.

| OR           | Simulation type   |                 | PLACO   |     |        |     | GPA    |      |
|--------------|-------------------|-----------------|---------|-----|--------|-----|--------|------|
|              | # null SNPs       | # non-null SNPs | FWER 5% |     | FDR 5% |     | FDR 5% |      |
|              |                   |                 | #TP     | #FP | #TP    | #FP | #TP    | #FP  |
| (1.5, 1.5)   | $9.9 \times 10^6$ | 0               | 0       | 0   | 0      | 0   | 0      | 0    |
|              | $9.9 \times 10^6$ | 100             | 60      | 0   | 68     | 5   | 1      | 0    |
|              | $9.9 \times 10^6$ | 300             | 185     | 0   | 239    | 19  | 163    | 2    |
|              | $9.9 \times 10^6$ | 500             | 310     | 0   | 408    | 30  | 471    | 66   |
|              | $9.9 \times 10^6$ | 1000            | 611     | 0   | 859    | 56  | 981    | 287  |
|              | $9.9 \times 10^6$ | 3000            | 1807    | 0   | 2645   | 142 | 2968   | 584  |
|              | $9.9 \times 10^6$ | 5000            | 3024    | 0   | 4518   | 224 | 4964   | 882  |
|              | $9.9 \times 10^6$ | $10^4$          | 6004    | 0   | 9164   | 456 | 9942   | 1595 |
| (1.7, 1.7)   | $9.9 \times 10^6$ | 0               | 0       | 0   | 0      | 0   | 0      | 0    |
|              | $9.9 \times 10^6$ | 100             | 94      | 0   | 99     | 8   | 76     | 0    |
|              | $9.9 \times 10^6$ | 300             | 284     | 0   | 298    | 22  | 300    | 76   |
|              | $9.9 \times 10^6$ | 500             | 472     | 0   | 497    | 34  | 500    | 107  |
|              | $9.9 \times 10^6$ | 1000            | 961     | 0   | 996    | 63  | 1000   | 182  |
|              | $9.9 \times 10^6$ | 3000            | 2906    | 0   | 2991   | 156 | 3000   | 440  |
|              | $9.9 \times 10^6$ | 5000            | 4854    | 0   | 4985   | 247 | 5000   | 676  |
|              | $9.9 \times 10^6$ | $10^4$          | 9711    | 0   | 9974   | 499 | 10000  | 1238 |
| (1.5, 1/1.5) | $9.9 \times 10^6$ | 0               | 0       | 0   | 0      | 0   | 0      | 0    |
|              | $9.9 \times 10^6$ | 100             | 51      | 0   | 59     | 4   | 0      | 0    |
|              | $9.9 \times 10^6$ | 300             | 146     | 0   | 189    | 16  | 286    | 124  |
|              | $9.9 \times 10^6$ | 500             | 243     | 0   | 337    | 27  | 486    | 258  |
|              | $9.9 \times 10^6$ | 1000            | 493     | 0   | 737    | 54  | 973    | 309  |
|              | $9.9 \times 10^6$ | 3000            | 1385    | 0   | 2331   | 126 | 2947   | 610  |
|              | $9.9 \times 10^6$ | 5000            | 2294    | 0   | 4043   | 206 | 4932   | 906  |
|              | $9.9 \times 10^6$ | $10^4$          | 4571    | 0   | 8416   | 422 | 9916   | 1627 |
| (1.7, 1/1.7) | $9.9 \times 10^6$ | 0               | 0       | 0   | 0      | 0   | 0      | 0    |
|              | $9.9 \times 10^6$ | 100             | 87      | 0   | 92     | 6   | 98     | 5    |
|              | $9.9 \times 10^6$ | 300             | 264     | 0   | 284    | 21  | 300    | 90   |
|              | $9.9 \times 10^6$ | 500             | 444     | 0   | 480    | 32  | 500    | 121  |
|              | $9.9 \times 10^6$ | 1000            | 890     | 0   | 970    | 61  | 1000   | 202  |
|              | $9.9 \times 10^6$ | 3000            | 2672    | 0   | 2936   | 155 | 3000   | 479  |
|              | $9.9 \times 10^6$ | 5000            | 4466    | 0   | 4908   | 243 | 5000   | 731  |
|              | $9.9 \times 10^6$ | $10^4$          | 8929    | 0   | 9858   | 495 | 10000  | 1329 |
| (1.7, 1.2)   | $9.9 \times 10^6$ | 0               | 0       | 0   | 0      | 0   | 0      | 0    |
|              | $9.9 \times 10^6$ | 100             | 24      | 0   | 27     | 2   | 0      | 0    |
|              | $9.9 \times 10^6$ | 300             | 64      | 0   | 90     | 5   | 300    | 175  |
|              | $9.9 \times 10^6$ | 500             | 112     | 0   | 171    | 15  | 500    | 189  |
|              | $9.9 \times 10^6$ | 1000            | 218     | 0   | 377    | 29  | 1000   | 277  |
|              | $9.9 \times 10^6$ | 3000            | 688     | 0   | 1348   | 79  | 3000   | 606  |
|              | $9.9 \times 10^6$ | 5000            | 1120    | 0   | 2414   | 128 | 5000   | 906  |
|              | $9.9 \times 10^6$ | $10^4$          | 2317    | 0   | 5276   | 257 | 10000  | 1606 |

# denotes total number (e.g. #TP denotes total number of true positives detected).
